# Supplementary material
Source: PubMed Central journal article supplement (PMC2758312)
Supplement: NIHMS146979-supplement-Appendix_A.pdf [file NIHMS146979-supplement-Appendix_A.pdf]

**Supplemental Table 1. TCEAL7 Genotype Frequencies**

| SNP        | Chr X Position | Alleles | LD Bin | Location      | MAF   | HWE  | All Cases |     |     | Controls |     |     |
|------------|----------------|---------|--------|---------------|-------|------|-----------|-----|-----|----------|-----|-----|
|            |                |         |        |               |       |      | AA        | AB  | BB  | AA       | AB  | BB  |
| rs5987515  | 102,465,559    | C>A     | ---    | 5' upstream   | 0.40  | 0.80 | 364       | 427 | 136 | 377      | 476 | 179 |
| rs5987724  | 102,465,772    | G>T     | ---    | 5' upstream   | 0.40  | 0.77 | 365       | 428 | 136 | 376      | 474 | 179 |
| rs5945971  | 102,470,061    | G>A     | 3      | 5' upstream   | 0.40  | 0.96 | 365       | 421 | 138 | 376      | 478 | 177 |
| rs17340307 | 102,470,522    | A>C     | ---    | 5' upstream   | <0.01 | 1.00 | 918       | 8   | 0   | 1033     | 3   | 0   |
| rs1045761  | 102,472,558    | C>G     | 2      | 5' UTR        | 0.49  | 0.83 | 275       | 448 | 204 | 286      | 488 | 260 |
| rs5945680  | 102,478,489    | C>T     | 1      | 3' downstream | 0.29  | 0.55 | 474       | 371 | 82  | 520      | 432 | 83  |

Position from genome build 36.3; dbSNP 129; Refseq Release 29 (May 4, 2008); call rate all participants; MAF, minor allele frequency, among controls; HWE p-value among Caucasian controls only; rs5945680 (LD bin 1) tags rs5945767 at  $r^2 > 0.8$ ; AA, major allele homozygotes, AB heterozygotes, BB minor allele homozygotes.
